# Supplementary material for: Diethylaminophenyl-based Schiff base Cu(ii) and V(iv) complexes: experimental and theoretical studies and cytotoxicity assays
Source: Royal Society of Chemistry journal article supplement (doi:10.1039/c9nj04975d), 2019-01-01
Supplement: c9nj04975d1.pdf [file c9nj04975d1.pdf]

Electronic Supplementary Information (ESI) for the article “**Diethylaminophenyl-based Schiff base Cu(II) and V(IV) complexes: experimental and theoretical study and cytotoxicity assays**” by Mariana Rocha<sup>1</sup>, M.C. Ruiz<sup>2</sup>, G. A. Echeverría<sup>3,+</sup>, O. E. Piro<sup>3,+</sup>, A.L. Di Virgilio<sup>2,+</sup>, I.E. León<sup>2,+</sup>, Antonio Frontera<sup>4,\*</sup> and Diego M. Gil<sup>1,+,\*</sup>

**Figure S1:** IR spectra of the Schiff base H<sub>2</sub>L and its Cu(II) and V(IV) complexes in solid state.

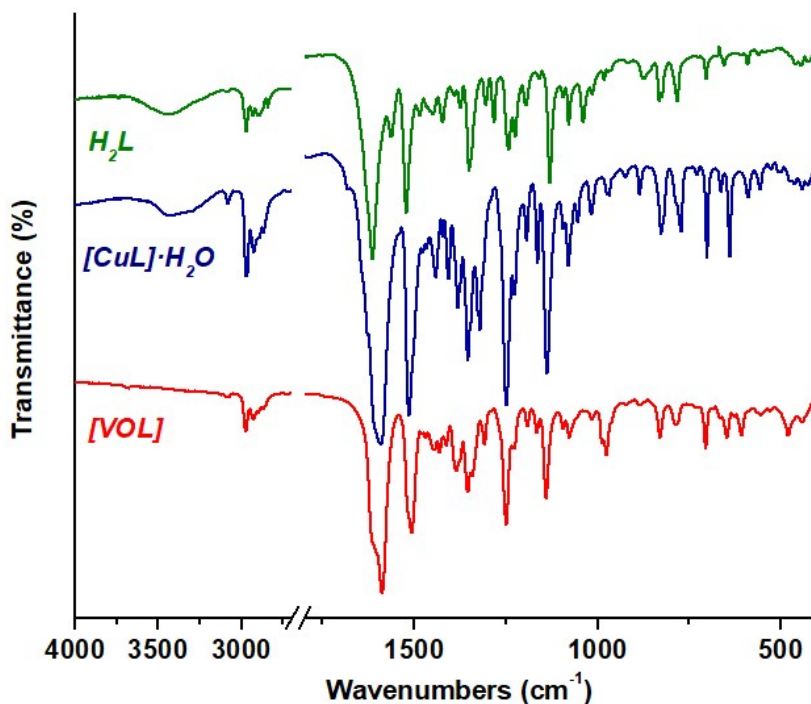

**Figure S2:** Electronic spectra (in solid state) of the Schiff base H<sub>2</sub>L and its complexes.

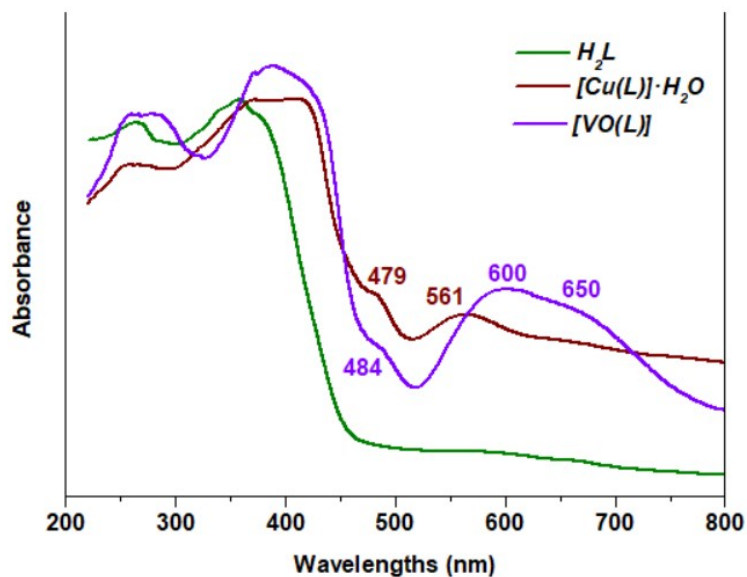

**Figure S3:** View of the crystal packing of compound (*1*) showing C-H $\cdots$ O intermolecular interactions as dashed lines.

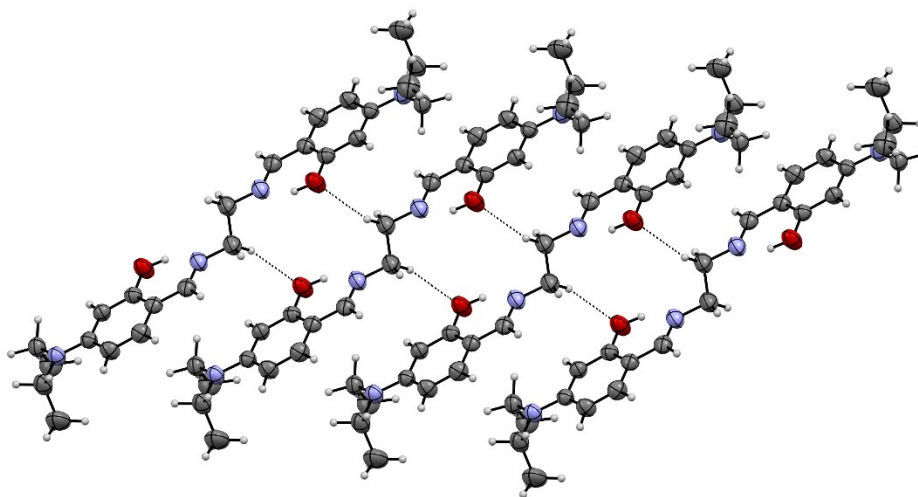

**Figure S4:** Self-assembled dimers present in compound (*2*) showing intramolecular O $\cdots$ H and intermolecular C-H $\cdots$ O contacts.

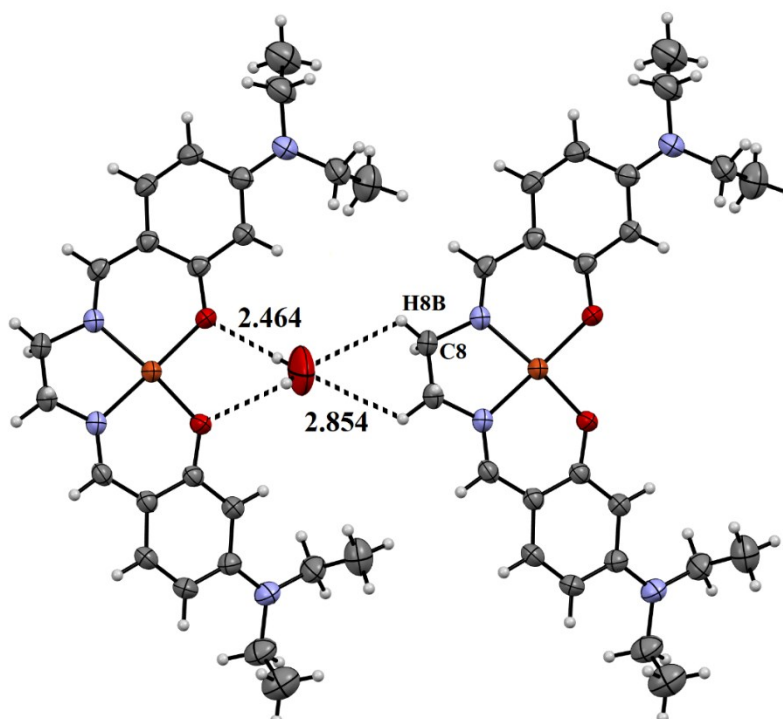

**Figure S5:** Self-assembled stacked dimers observed in compound (2).

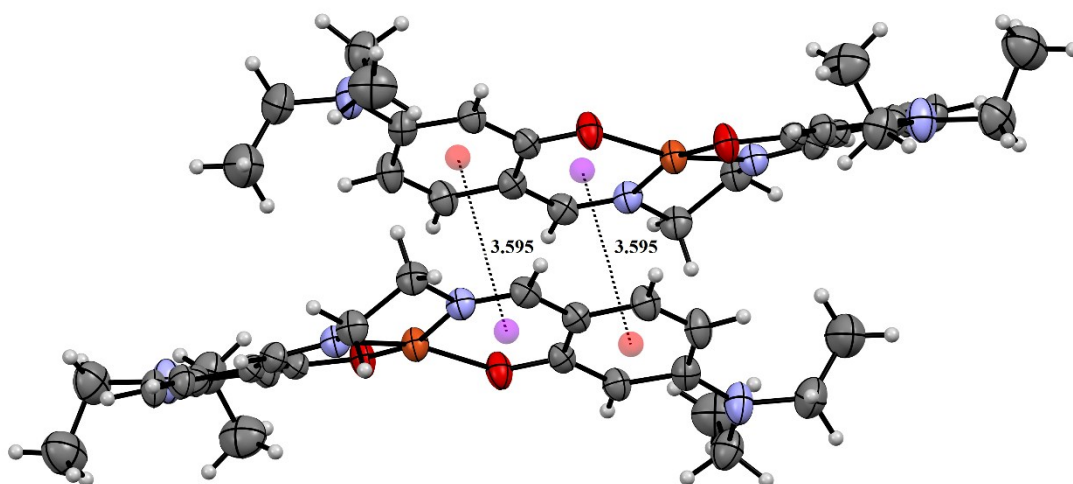

**Figure S6:** Hirshfeld surface of compound (2) mapped with *shape index* function.

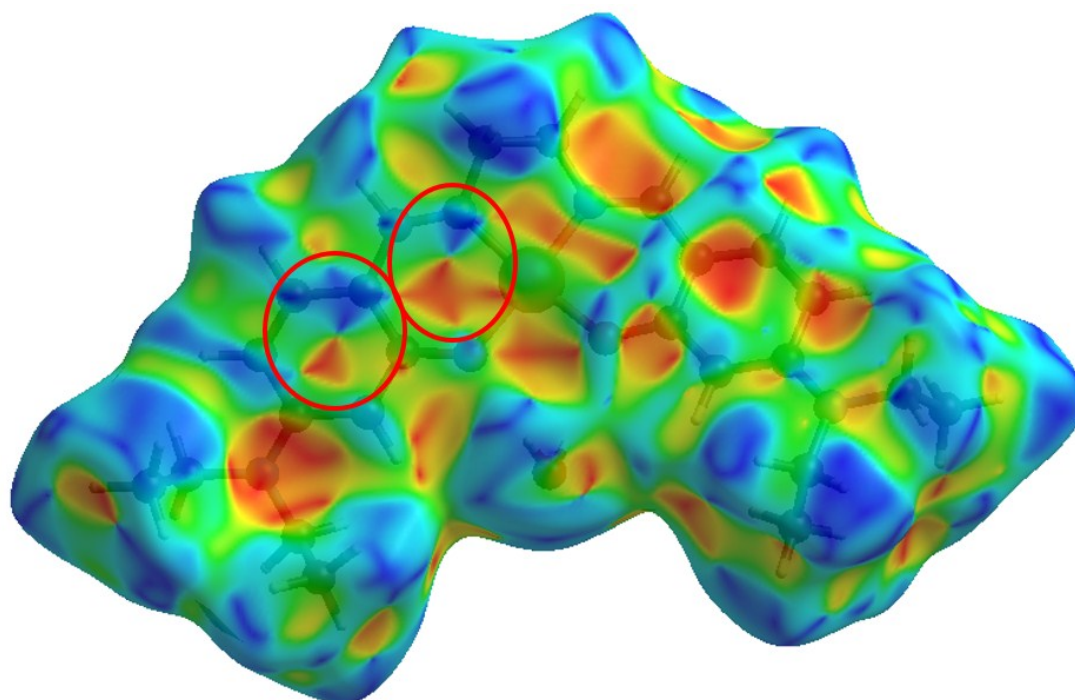

**Figure S7:** Effect of complexes **2** (green bars) and **3** (orange bars) on MG-63, MDA-MB-231, MCF-7 and HT-29 cell lines viability. The effect of the ligand (grey bars) and the control cells (black bars) are also shown. The results are expressed as percentage of the basal level and represent the mean  $\pm$  the standard error of the mean (n = 18). \*p<0.0001 differences between control and treatment.

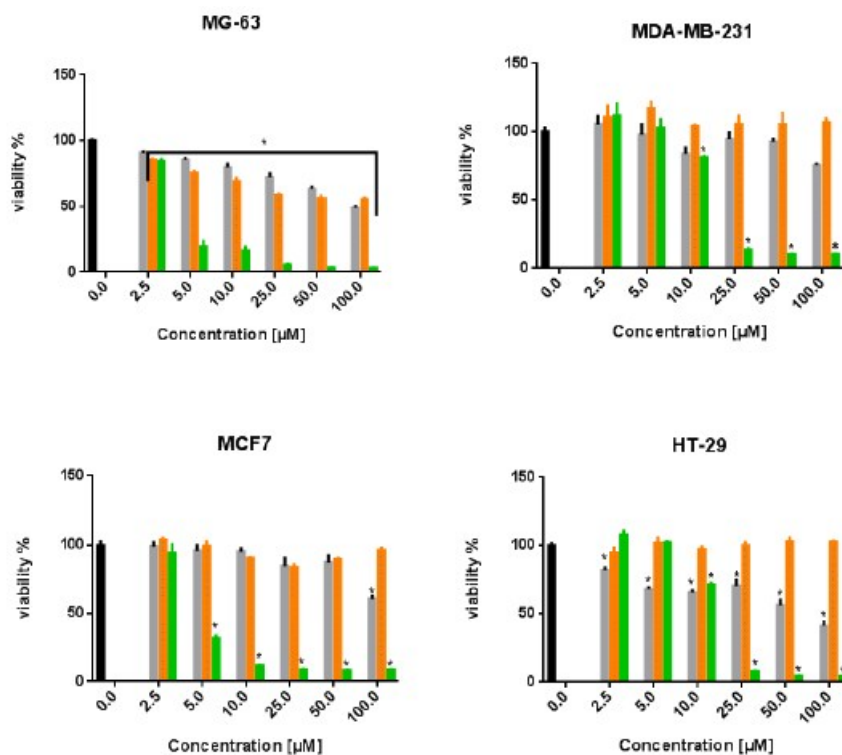

**Table S1:** Selected bond lengths (Å) and angles (°) in the crystal structure of the Schiff base H<sub>2</sub>L (*I*).

---

| <i>Bond lengths (Å)</i> |          | <i>Angles (°)</i>          |           |
|-------------------------|----------|----------------------------|-----------|
| C8-N1                   | 1.460(2) | C8-N1-C7                   | 119.1(2)  |
| C7-N1                   | 1.278(3) | C1-C7-N1                   | 122.5(2)  |
| C1-C7                   | 1.445(2) | C2-C1-C7                   | 121.9(2)  |
| C2-O                    | 1.359(2) | O-C2-C1                    | 120.6(2)  |
| C4-N2                   | 1.375(2) | C4-N2-C9                   | 120.9(1)  |
| C9-N2                   | 1.460(3) | C4-N2-C10                  | 121.6(2)  |
| C10-N2                  | 1.456(3) | <i>Dihedral angles (°)</i> |           |
| C9-C11                  | 1.510(4) | C8-N1-C7-C1                | 179.5(2)  |
| C10-C12                 | 1.500(4) | N1-C7-C1-C6                | -179.7(2) |
|                         |          | C2-C1-C7-N1                | 1.8(3)    |
|                         |          | N1-C8-C8-N1                | 180.0(2)  |

---
